# Supplementary material
Source: HighWire-hosted journal article supplement (https://jitc.bmj.com/content/9/3/e001962)
Supplement: inline-supplementary-material-1 [file inline-supplementary-material-1.pdf]

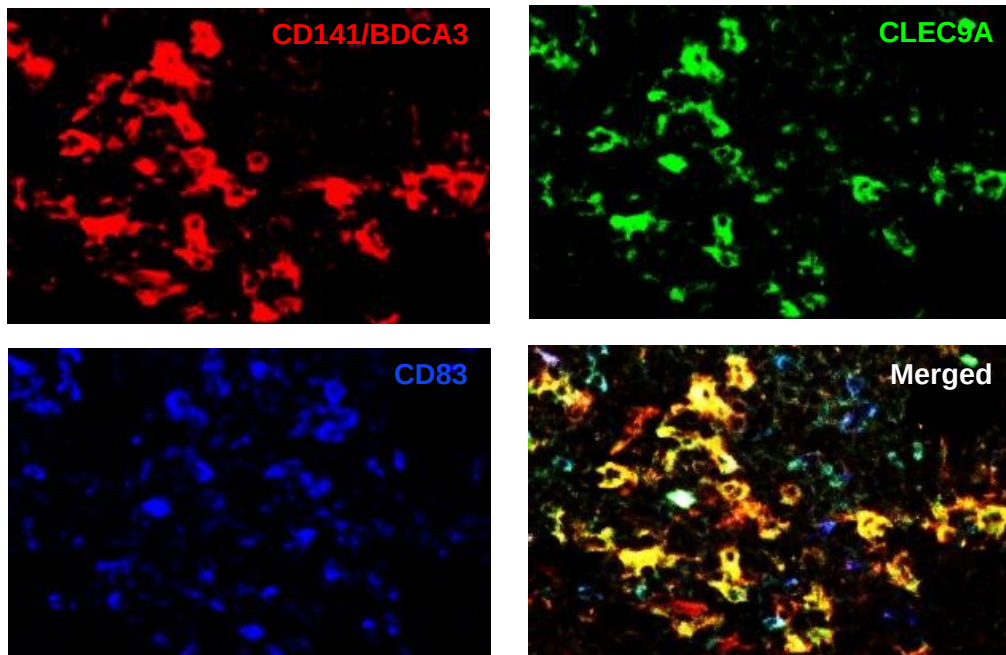

**Supplementary Figure 1**

**Supplementary Figure 1. cDC1 in tonsil tissue**

A representative positive control example a CD83(blue)/CD141(red)/CLEC9A(green) triple fluorescent IHC stain on a tonsil section
