# Supplementary material
Source: HighWire-hosted journal article supplement (https://jitc.bmj.com/content/9/3/e001962)
Supplement: inline-supplementary-material-3 [file inline-supplementary-material-3.pdf]

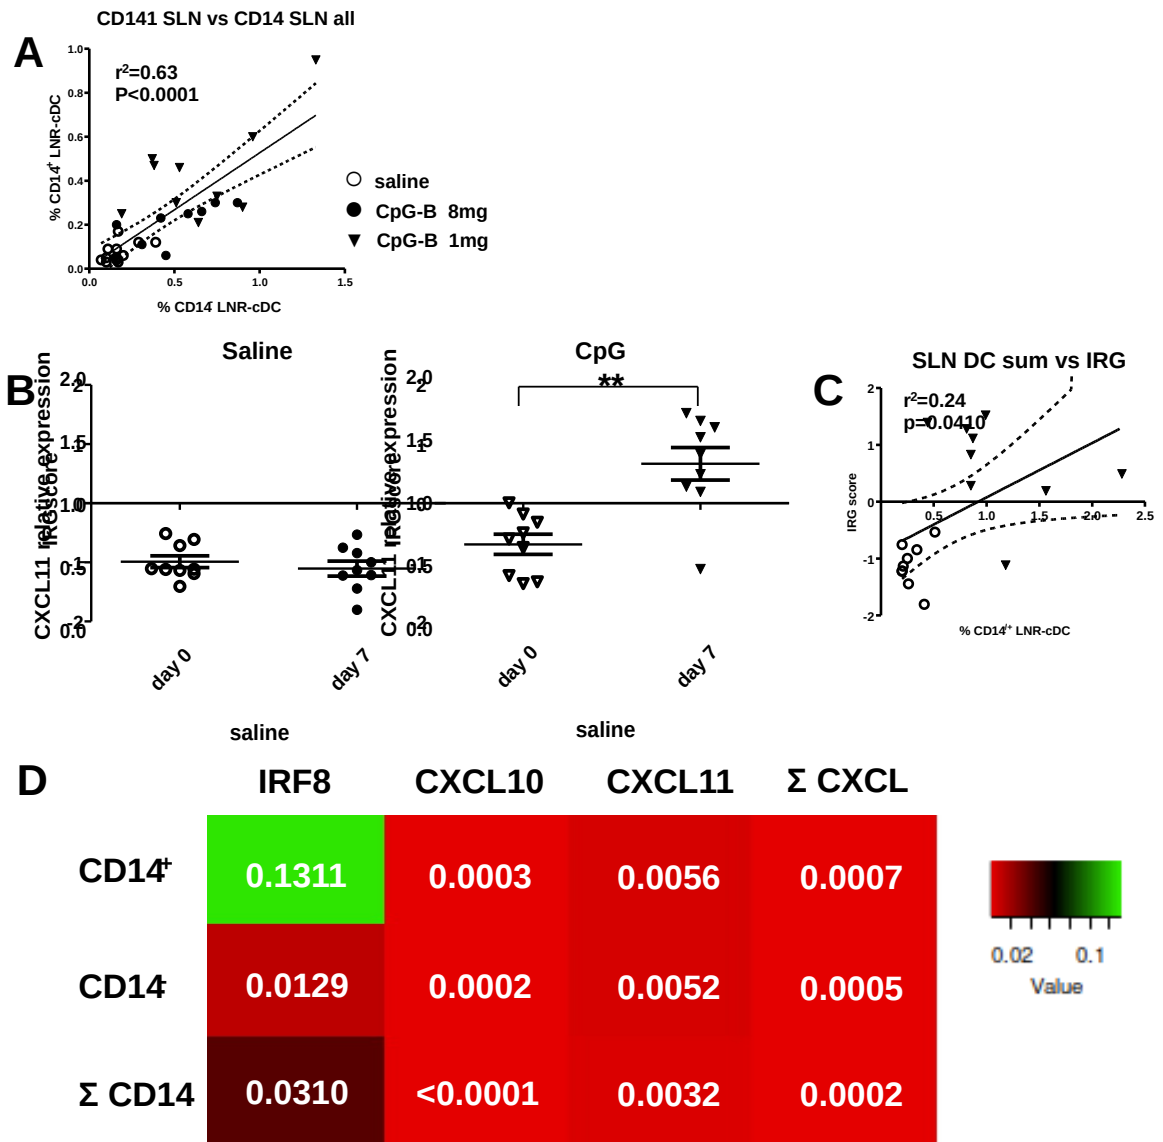

Supplementary Figure 3

**Supplementary Figure 3. Lymph node resident (LNR) cDC subsets in relation to a CpG-B induced type-1 IFN (IFN-I) response signature**

A) We found similar co-recruitment of CD14<sup>-</sup> and CD14<sup>+</sup> LNR-cDC/APC to the SLN at different dose levels of CpG-B (1 and 8 mg) in two separate trials. B) Transcriptional analysis of 47 known IFN-I response genes (IRG) showed that there was a significant induction of an IFN-I response in PBMC at 7 days after the first i.d. injection of 1mg CpG-B. C) IRG score correlated significantly with the CD14<sup>-</sup> and CD14<sup>+</sup> LNR-cDC rates in SLN. D) Heat map of Pearson correlation P values for the IRF8 and the separate or combined CXCL10 and CXCL11 transcript levels versus the separate or combined CD14<sup>-</sup> and CD14<sup>+</sup> cDC rates in the SLN. Heat map constructed in [heatmapper.ca](http://heatmapper.ca).
